# Supplementary material for: Environmental Impacts and Immobilization Mechanisms of Cadmium, Lead and Zinc in Geotechnical Composites Made from Contaminated Soil and Paper-Ash
Source: MDPI journal article supplement (doi:10.3390/app112411822), 2021-12-13
Supplement: s1 [file s1]

# Supplementary Materials: Environmental Impacts and Immobilization Mechanisms of Cadmium, Lead and Zinc in Geotechnical Composites Made from Contaminated Soil and Paper-Ash

Marija Djurić <sup>1,3</sup>, Primož Oprčkal <sup>1</sup>, Vesna Zalar Serjun <sup>1</sup>, Alenka Mauko Pranjić <sup>1</sup>, Janez Ščančar <sup>2,3</sup>,  
Radmila Milačić <sup>2,3,\*</sup> and Ana Mladenović <sup>1,\*</sup>

<sup>1</sup> Department, Slovenian National Building and Civil Engineering Institute, Dimičeva 12, 1000 Ljubljana, Slovenia; marija.djuric@zag.si (M.D.), primoz.oprckal@zag.si (P.O.); vesna.zalar@zag.si (V.Z.S.); alenka.mauko@zag.si (A.M.P.)

<sup>2</sup> Department of Environmental Sciences, Jožef Stefan Institute, Jamova 39, 1000 Ljubljana, Slovenia; janez.scancar@ijs.si

<sup>3</sup> Jožef Stefan International Postgraduate School, Jamova 39, 1000 Ljubljana, Slovenia

\* Correspondence: radmila.milacic@ijs.si (R.M.); ana.mladenovic@zag.si (A.M.); Tel.: +386-1-477-3560 (R.M.); +386-1-280-4394 (A.M.)

**Table S1.** ICP-MS operating parameters for determination of element concentrations.

| Parameter                          | Type/Value | Helium mode                                                             | No gas mode                                                             |
|------------------------------------|------------|-------------------------------------------------------------------------|-------------------------------------------------------------------------|
| <i>Sample introduction</i>         |            |                                                                         |                                                                         |
| Nebuliser                          | Miramist   |                                                                         |                                                                         |
| Spray chamber                      | Scott      |                                                                         |                                                                         |
| Skimmer and sampler                | Ni         |                                                                         |                                                                         |
| <i>Plasma conditions</i>           |            |                                                                         |                                                                         |
| Forward power                      | 1550 W     |                                                                         |                                                                         |
| Plasma gas flow                    | 15.0 L/min |                                                                         |                                                                         |
| Carrier gas flow                   |            | 1.05 L/min                                                              | 0.75 L/min                                                              |
| Dilution gas flow                  |            | 0.10 L/min                                                              | 0.45 L/min                                                              |
| He gas flow                        |            | 4.5 mL/min                                                              |                                                                         |
| QP bias                            |            | -15 V                                                                   | -3.6 V                                                                  |
| Oct bias                           |            | -18 V                                                                   | -8.0 V                                                                  |
| Cell entrance                      |            | -40 V                                                                   | -40 V                                                                   |
| Cell exit                          |            | -60 V                                                                   | -50 V                                                                   |
| Deflect                            |            | -2.2 V                                                                  | 13.4 V                                                                  |
| Plate bias                         |            | -60 V                                                                   | -40 V                                                                   |
| Sample uptake rate                 | 0.3 mL/min |                                                                         |                                                                         |
| <i>Data acquisition parameters</i> |            |                                                                         |                                                                         |
| Isotopes monitored                 |            | <sup>66</sup> Zn                                                        | <sup>111</sup> Cd, <sup>208</sup> Pb                                    |
| Isotopes of internal standards     |            | <sup>72</sup> Ge, <sup>89</sup> Y, <sup>103</sup> Rh, <sup>115</sup> In | <sup>72</sup> Ge, <sup>89</sup> Y, <sup>103</sup> Rh, <sup>115</sup> In |

**Table S2.** Concentrations of elements in standard reference material SPS-SW1 (Reference material for measurements of elements in surface waters) determined by ICP-MS. The results represent the mean concentration from three parallel samples. The uncertainty of ICP-MS determination was  $\pm 2\%$ .

| Parameter | Certified concentration<br>( $\mu\text{g/L}$ ) | Determined concentration<br>( $\mu\text{g/L}$ ) |
|-----------|------------------------------------------------|-------------------------------------------------|
| Cd        | 0.50 $\pm$ 0.01                                | 0.48 $\pm$ 0.01                                 |
| Pb        | 5.0 $\pm$ 0.1                                  | 4.94 $\pm$ 0.15                                 |
| Zn        | 20 <sup>a</sup>                                | 19.7 $\pm$ 0.6                                  |

<sup>a</sup>informative value**Table S3.** Concentrations of elements in certified reference material CRM 320R (Trace Elements in River Sediment) determined by ICP-MS after microwave assisted digestion. The results represent the mean concentration from three parallel samples. The expanded uncertainty of analytical procedure was better than  $\pm 3\%$  ( $k = 2$ ).

| Element | Certified<br>(mg/kg) | Determined<br>(mg/kg) |
|---------|----------------------|-----------------------|
| Cd      | 2.64 $\pm$ 0.18      | 2.52 $\pm$ 0.07       |
| Zn      | 319 $\pm$ 20         | 308 $\pm$ 9           |
| Pb      | 85 $\pm$ 5           | 87 $\pm$ 2            |

**Table S4.** Concentrations of Cd in individual fractions of extraction procedure in uncontaminated, contaminated, and remediated soils during the course of the experiment. Concentrations of Cd were determined by ICP-MS. The results represent the mean concentration from two parallel samples. The expanded uncertainty of analytical procedure was better than  $\pm 3\%$  ( $k = 2$ ).

| Days after the start of the experiment | Extraction step     | Uncontaminated soil Cd (mg/kg) | Contaminated soil Cd (mg/kg) | Remediated soil Cd (mg/kg) |
|----------------------------------------|---------------------|--------------------------------|------------------------------|----------------------------|
| 7                                      | I                   | 0.0007                         | 0.07                         | 0.0007                     |
|                                        | II                  | 0.0007                         | 1.30                         | 0.0007                     |
|                                        | III                 | 0.015                          | 5.90                         | 0.07                       |
|                                        | IV                  | 0.012                          | 0.32                         | 6.80                       |
|                                        | V                   | 0.0007                         | 0.01                         | 0.03                       |
|                                        | VI                  | 1.01                           | 1.20                         | 0.80                       |
|                                        | Total concentration | 1.04                           | 8.73                         | 7.70                       |
| 28                                     | I                   | 0.0007                         | 0.57                         | 0.0005                     |
|                                        | II                  | 0.0007                         | 0.47                         | 0.0007                     |
|                                        | III                 | 0.015                          | 4.80                         | 0.93                       |
|                                        | IV                  | 0.012                          | 0.60                         | 0.51                       |
|                                        | V                   | 0.0007                         | 0.01                         | 0.006                      |
|                                        | VI                  | 1.01                           | 2.30                         | 6.10                       |
|                                        | Total concentration | 1.04                           | 8.73                         | 7.70                       |
| 56                                     | I                   | 0.0007                         | 0.39                         | 0.0005                     |
|                                        | II                  | 0.0007                         | 0.41                         | 0.0005                     |
|                                        | III                 | 0.015                          | 2.60                         | 1.50                       |
|                                        | IV                  | 0.012                          | 0.45                         | 3.30                       |
|                                        | V                   | 0.0007                         | 0.01                         | 0.002                      |
|                                        | VI                  | 1.01                           | 4.90                         | 2.90                       |
|                                        | Total concentration | 1.04                           | 8.73                         | 7.70                       |
| 90                                     | I                   | 0.0007                         | 0.62                         | 0.0005                     |
|                                        | II                  | 0.0007                         | 0.22                         | 0.0005                     |
|                                        | III                 | 0.015                          | 2.90                         | 1.50                       |
|                                        | IV                  | 0.012                          | 0.51                         | 5.80                       |
|                                        | V                   | 0.0007                         | 0.01                         | 0.003                      |
|                                        | VI                  | 1.01                           | 4.40                         | 0.40                       |
|                                        | Total concentration | 1.04                           | 8.73                         | 7.70                       |
| 120                                    | I                   | 0.0007                         | 0.80                         | 0.0008                     |
|                                        | II                  | 0.0007                         | 1.40                         | 0.006                      |
|                                        | III                 | 0.015                          | 5.60                         | 4.30                       |
|                                        | IV                  | 0.012                          | 0.83                         | 3.30                       |
|                                        | V                   | 0.0007                         | 0.003                        | 0.006                      |
|                                        | VI                  | 1.01                           | 0.10                         | 0.10                       |
|                                        | Total concentration | 1.04                           | 8.73                         | 7.70                       |
| 365                                    | I                   | 0.0007                         | 0.75                         | 0.0005                     |
|                                        | II                  | 0.0007                         | 1.50                         | 0.007                      |
|                                        | III                 | 0.015                          | 5.90                         | 3.60                       |
|                                        | IV                  | 0.012                          | 0.51                         | 3.20                       |
|                                        | V                   | 0.0007                         | 0.01                         | 0.03                       |
|                                        | VI                  | 1.01                           | 0.04                         | 0.80                       |
|                                        | Total concentration | 1.04                           | 8.73                         | 7.70                       |

**Table S5.** Concentrations of Pb in individual fractions of extraction procedure in uncontaminated, contaminated, and remediated soils during the course of the experiment. Concentrations of Pb were determined by ICP-MS. The results represent the mean concentration from two parallel samples. The expanded uncertainty of analytical procedure was better than  $\pm 3\%$  ( $k = 2$ ).

| Days after the start of the experiment | Extraction step     | Uncontaminated soil<br>Pb (mg/kg) | Contaminated soil<br>Pb (mg/kg) | Remediated soil<br>Pb (mg/kg) |
|----------------------------------------|---------------------|-----------------------------------|---------------------------------|-------------------------------|
| 7                                      | I                   | 0.0003                            | 0.04                            | 2.1                           |
|                                        | II                  | 0.0003                            | 1.60                            | 1.2                           |
|                                        | III                 | 0.0021                            | 68.4                            | 0.31                          |
|                                        | IV                  | 0.18                              | 244                             | 634                           |
|                                        | V                   | 0.0043                            | 0.45                            | 0.0003                        |
|                                        | VI                  | 9.3                               | 631                             | 127                           |
|                                        | Total concentration | 9.5                               | 946                             | 767                           |
| 28                                     | I                   | 0.0003                            | 0.41                            | 0.13                          |
|                                        | II                  | 0.0003                            | 2.03                            | 0.32                          |
|                                        | III                 | 0.0021                            | 617                             | 72.6                          |
|                                        | IV                  | 0.18                              | 273                             | 240.8                         |
|                                        | V                   | 0.0043                            | 0.17                            | 0.001                         |
|                                        | VI                  | 9.3                               | 53.3                            | 453                           |
|                                        | Total concentration | 9.5                               | 946                             | 767                           |
| 56                                     | I                   | 0.0003                            | 0.19                            | 0.001                         |
|                                        | II                  | 0.0003                            | 1.4                             | 0.005                         |
|                                        | III                 | 0.0021                            | 313                             | 169                           |
|                                        | IV                  | 0.18                              | 143.2                           | 478                           |
|                                        | V                   | 0.0043                            | 0.49                            | 0.0007                        |
|                                        | VI                  | 9.3                               | 488                             | 120                           |
|                                        | Total concentration | 9.5                               | 946                             | 767                           |
| 90                                     | I                   | 0.0003                            | 0.27                            | 0.0002                        |
|                                        | II                  | 0.0003                            | 1.24                            | 0.014                         |
|                                        | III                 | 0.0021                            | 350                             | 163                           |
|                                        | IV                  | 0.18                              | 127                             | 414                           |
|                                        | V                   | 0.0043                            | 0.29                            | 0.0002                        |
|                                        | VI                  | 9.3                               | 467                             | 190                           |
|                                        | Total concentration | 9.5                               | 946                             | 767                           |
| 120                                    | I                   | 0.0003                            | 0.24                            | 0.002                         |
|                                        | II                  | 0.0003                            | 3.7                             | 0.030                         |
|                                        | III                 | 0.0021                            | 373                             | 177                           |
|                                        | IV                  | 0.18                              | 158                             | 341                           |
|                                        | V                   | 0.0043                            | 0.0001                          | 0.0002                        |
|                                        | VI                  | 9.3                               | 411                             | 250                           |
|                                        | Total concentration | 9.5                               | 946                             | 767                           |
| 365                                    | I                   | 0.0003                            | 0.21                            | 0.002                         |
|                                        | II                  | 0.0003                            | 7.97                            | 0.12                          |
|                                        | III                 | 0.0021                            | 670                             | 228                           |
|                                        | IV                  | 0.18                              | 180                             | 508                           |
|                                        | V                   | 0.0043                            | 0.37                            | 0.020                         |
|                                        | VI                  | 9.3                               | 57.5                            | 31.5                          |
|                                        | Total concentration | 9.5                               | 946                             | 767                           |

**Table S6.** Concentrations of Zn in individual fractions of extraction procedure in in uncontaminated, contaminated, and remediated soils during the course of the experiment. Concentrations of Zn were determined by ICP-MS. The results represent the mean concentration from two parallel samples. The expanded uncertainty of analytical procedure was better than  $\pm 3\%$  ( $k = 2$ ).

| Days after the start of the experiment | Extraction step     | Uncontaminated soil Zn (mg/kg) | Contaminated soil Zn (mg/kg) | Remediated soil Zn (mg/kg) |
|----------------------------------------|---------------------|--------------------------------|------------------------------|----------------------------|
| 7                                      | I                   | 0.0025                         | 69.0                         | 7.6                        |
|                                        | II                  | 0.0025                         | 15.1                         | 6.4                        |
|                                        | III                 | 0.063                          | 7338                         | 5.6                        |
|                                        | IV                  | 0.22                           | 993                          | 7075                       |
|                                        | V                   | 0.14                           | 15.2                         | 1.9                        |
|                                        | VI                  | 40.9                           | 384                          | 395                        |
|                                        | Total concentration | 41.3                           | 8814                         | 7491                       |
| 28                                     | I                   | 0.0025                         | 50.7                         | 0.6                        |
|                                        | II                  | 0.0025                         | 15.4                         | 1.4                        |
|                                        | III                 | 0.063                          | 7022                         | 1613                       |
|                                        | IV                  | 0.22                           | 913                          | 877                        |
|                                        | V                   | 0.14                           | 5.4                          | 1.7                        |
|                                        | VI                  | 40.9                           | 808                          | 4998                       |
|                                        | Total concentration | 41.3                           | 8814                         | 7491                       |
| 56                                     | I                   | 0.0025                         | 34.7                         | 0.0012                     |
|                                        | II                  | 0.0025                         | 10.4                         | 0.015                      |
|                                        | III                 | 0.063                          | 5763                         | 2932                       |
|                                        | IV                  | 0.22                           | 596                          | 3861                       |
|                                        | V                   | 0.14                           | 5.1                          | 0.074                      |
|                                        | VI                  | 40.9                           | 2405                         | 698                        |
|                                        | Total concentration | 41.3                           | 8814                         | 7491                       |
| 90                                     | I                   | 0.0025                         | 58.3                         | 0.1362                     |
|                                        | II                  | 0.0025                         | 9.3                          | 0.161                      |
|                                        | III                 | 0.063                          | 6660                         | 3568                       |
|                                        | IV                  | 0.22                           | 525.3                        | 3298                       |
|                                        | V                   | 0.14                           | 3.4                          | 0.191                      |
|                                        | VI                  | 40.9                           | 1557                         | 624                        |
|                                        | Total concentration | 41.3                           | 8814                         | 7491                       |
| 120                                    | I                   | 0.0025                         | 63.6                         | 0.44                       |
|                                        | II                  | 0.0025                         | 41.2                         | 0.52                       |
|                                        | III                 | 0.063                          | 7563                         | 3198                       |
|                                        | IV                  | 0.22                           | 753                          | 3793                       |
|                                        | V                   | 0.14                           | 0.10                         | 0.55                       |
|                                        | VI                  | 40.9                           | 393                          | 498                        |
|                                        | Total concentration | 41.3                           | 8814                         | 7491                       |
| 365                                    | I                   | 0.0025                         | 55.3                         | 0.41                       |
|                                        | II                  | 0.0025                         | 36.8                         | 0.65                       |
|                                        | III                 | 0.063                          | 7606                         | 2033                       |
|                                        | IV                  | 0.22                           | 656                          | 5024                       |
|                                        | V                   | 0.14                           | 1.70                         | 12.0                       |
|                                        | VI                  | 40.9                           | 458                          | 421                        |
|                                        | Total concentration | 41.3                           | 8814                         | 7491                       |

**Table S7.** Concentrations of Cd in individual fractions of extraction procedure in uncontaminated soil treated with CaSO<sub>4</sub>, contaminated and remediated soils during the course of the experiment. Concentrations of Cd were determined by ICP-MS. The results represent the mean concentration from two parallel samples. The expanded uncertainty of analytical procedure was better than  $\pm 3\%$  ( $k = 2$ ).

| Days after the start of the experiment | Extraction step     | Uncontaminated soil Cd (mg/kg) | Contaminated soil Cd (mg/kg) | Remediated soil Cd (mg/kg) |
|----------------------------------------|---------------------|--------------------------------|------------------------------|----------------------------|
| 7                                      | I                   | 0.0007                         | 0.12                         | 0.0007                     |
|                                        | II                  | 0.0007                         | 2.00                         | 0.0007                     |
|                                        | III                 | 0.015                          | 4.70                         | 0.072                      |
|                                        | IV                  | 0.009                          | 0.23                         | 6.40                       |
|                                        | V                   | 0.0007                         | 0.01                         | 0.01                       |
|                                        | VI                  | 0.97                           | 1.90                         | 1.30                       |
|                                        | Total concentration | 0.99                           | 8.90                         | 7.70                       |
| 28                                     | I                   | 0.0007                         | 1.5                          | 0.0005                     |
|                                        | II                  | 0.0007                         | 0.83                         | 0.0005                     |
|                                        | III                 | 0.015                          | 3.80                         | 1.40                       |
|                                        | IV                  | 0.009                          | 0.54                         | 0.57                       |
|                                        | V                   | 0.0007                         | 0.01                         | 0.008                      |
|                                        | VI                  | 0.97                           | 2.30                         | 5.70                       |
|                                        | Total concentration | 0.99                           | 8.90                         | 7.70                       |
| 56                                     | I                   | 0.0007                         | 0.96                         | 0.0004                     |
|                                        | II                  | 0.0007                         | 0.93                         | 0.0004                     |
|                                        | III                 | 0.015                          | 3.40                         | 1.10                       |
|                                        | IV                  | 0.009                          | 0.46                         | 2.80                       |
|                                        | V                   | 0.0007                         | 0.009                        | 0.0009                     |
|                                        | VI                  | 0.97                           | 3.20                         | 3.90                       |
|                                        | Total concentration | 0.99                           | 8.90                         | 7.70                       |
| 90                                     | I                   | 0.0007                         | 0.83                         | 0.0005                     |
|                                        | II                  | 0.0007                         | 0.22                         | 0.0005                     |
|                                        | III                 | 0.015                          | 3.40                         | 1.30                       |
|                                        | IV                  | 0.009                          | 0.51                         | 5.30                       |
|                                        | V                   | 0.0007                         | 0.007                        | 0.002                      |
|                                        | VI                  | 0.97                           | 4.00                         | 1.20                       |
|                                        | Total concentration | 0.99                           | 8.90                         | 7.70                       |
| 120                                    | I                   | 0.0007                         | 1.00                         | 0.002                      |
|                                        | II                  | 0.0007                         | 1.60                         | 0.006                      |
|                                        | III                 | 0.015                          | 5.60                         | 4.20                       |
|                                        | IV                  | 0.009                          | 0.63                         | 3.30                       |
|                                        | V                   | 0.0007                         | 0.00                         | 0.006                      |
|                                        | VI                  | 0.97                           | 0.10                         | 0.20                       |
|                                        | Total concentration | 0.99                           | 8.90                         | 7.70                       |
| 365                                    | I                   | 0.0007                         | 1.30                         | 0.002                      |
|                                        | II                  | 0.0007                         | 2.00                         | 0.005                      |
|                                        | III                 | 0.015                          | 5.10                         | 3.80                       |
|                                        | IV                  | 0.009                          | 0.50                         | 3.30                       |
|                                        | V                   | 0.0007                         | 0.01                         | 0.023                      |
|                                        | VI                  | 0.97                           | 0.10                         | 0.90                       |
|                                        | Total concentration | 0.99                           | 8.90                         | 7.70                       |

**Table S8.** Concentrations of Pb in individual fractions of extraction procedure in uncontaminated soil treated with CaSO<sub>4</sub>, contaminated and remediated soils during the course of the experiment. Concentrations of Pb were determined by ICP-MS. The results represent the mean concentration from two parallel samples. The expanded uncertainty of analytical procedure was better than  $\pm 3\%$  ( $k = 2$ ).

| Days after the start of the experiment | Extraction step     | Uncontaminated soil<br>Pb (mg/kg) | Contaminated soil<br>Pb (mg/kg) | Remediated soil<br>Pb (mg/kg) |
|----------------------------------------|---------------------|-----------------------------------|---------------------------------|-------------------------------|
| 7                                      | I                   | 0.0003                            | 0.0461                          | 2.43                          |
|                                        | II                  | 0.0003                            | 5.50                            | 1.28                          |
|                                        | III                 | 0.0028                            | 68.00                           | 4.48                          |
|                                        | IV                  | 0.20                              | 238                             | 621                           |
|                                        | V                   | 0.0067                            | 0.15                            | 0.0003                        |
|                                        | VI                  | 8.50                              | 659                             | 44.5                          |
|                                        | Total concentration | 8.70                              | 970                             | 734                           |
| 28                                     | I                   | 0.0003                            | 0.77                            | 0.022                         |
|                                        | II                  | 0.0003                            | 5.50                            | 0.064                         |
|                                        | III                 | 0.0028                            | 713                             | 103                           |
|                                        | IV                  | 0.20                              | 228                             | 259                           |
|                                        | V                   | 0.0067                            | 0.13                            | 0.002                         |
|                                        | VI                  | 8.50                              | 22.3                            | 311                           |
|                                        | Total concentration | 8.70                              | 967                             | 734                           |
| 56                                     | I                   | 0.0003                            | 0.35                            | 0.0004                        |
|                                        | II                  | 0.0003                            | 6.30                            | 0.005                         |
|                                        | III                 | 0.0028                            | 491                             | 95.3                          |
|                                        | IV                  | 0.20                              | 156                             | 470                           |
|                                        | V                   | 0.0067                            | 0.19                            | 0.0001                        |
|                                        | VI                  | 8.50                              | 316                             | 168                           |
|                                        | Total concentration | 8.70                              | 970                             | 734                           |
| 90                                     | I                   | 0.0003                            | 0.32                            | 0.0003                        |
|                                        | II                  | 0.0003                            | 2.58                            | 0.0078                        |
|                                        | III                 | 0.0028                            | 515                             | 122                           |
|                                        | IV                  | 0.20                              | 139                             | 325                           |
|                                        | V                   | 0.0067                            | 0.28                            | 0.0002                        |
|                                        | VI                  | 8.50                              | 313                             | 287                           |
|                                        | Total concentration | 8.70                              | 970                             | 734                           |
| 120                                    | I                   | 0.0003                            | 0.37                            | 0.0014                        |
|                                        | II                  | 0.0003                            | 2.5                             | 0.029                         |
|                                        | III                 | 0.0028                            | 374                             | 194                           |
|                                        | IV                  | 0.20                              | 157                             | 328                           |
|                                        | V                   | 0.0067                            | 0.001                           | 0.0002                        |
|                                        | VI                  | 8.50                              | 436                             | 211                           |
|                                        | Total concentration | 8.70                              | 970                             | 734                           |
| 365                                    | I                   | 0.0003                            | 0.41                            | 0.0037                        |
|                                        | II                  | 0.0003                            | 17.5                            | 0.07                          |
|                                        | III                 | 0.0028                            | 753.3                           | 205                           |
|                                        | IV                  | 0.20                              | 171.2                           | 501                           |
|                                        | V                   | 0.0067                            | 1.23                            | 0.0032                        |
|                                        | VI                  | 8.50                              | 25.9                            | 27.4                          |
|                                        | Total concentration | 8.70                              | 970                             | 734                           |

**Table S9.** Concentrations of Zn in individual fractions of extraction procedure in uncontaminated soil treated with CaSO<sub>4</sub>, contaminated and remediated soils during the course of the experiment. Concentrations of Zn were determined by ICP-MS. The results represent the mean concentration from two parallel samples. The expanded uncertainty of analytical procedure was better than  $\pm 3\%$  ( $k = 2$ ).

| Days after the start of the experiment | Extraction step     | Uncontaminated soil<br>Zn (mg/kg) | Contaminated soil<br>Zn (mg/kg) | Remediated soil<br>Zn (mg/kg) |
|----------------------------------------|---------------------|-----------------------------------|---------------------------------|-------------------------------|
| 7                                      | I                   | 0.0026                            | 101.2                           | 10.2                          |
|                                        | II                  | 0.0026                            | 50.7                            | 8.0                           |
|                                        | III                 | 0.047                             | 7596                            | 401                           |
|                                        | IV                  | 0.19                              | 847                             | 6511                          |
|                                        | V                   | 0.16                              | 10.5                            | 5.8                           |
|                                        | VI                  | 38.8                              | 77.4                            | 88.7                          |
|                                        | Total concentration | 39.2                              | 8782                            | 7024                          |
| 28                                     | I                   | 0.0026                            | 117                             | 0.4                           |
|                                        | II                  | 0.0026                            | 32.5                            | 0.6                           |
|                                        | III                 | 0.047                             | 7235                            | 3022                          |
|                                        | IV                  | 0.19                              | 376.1                           | 421                           |
|                                        | V                   | 0.16                              | 5.6                             | 2.6                           |
|                                        | VI                  | 38.8                              | 915                             | 3578                          |
|                                        | Total concentration | 39.2                              | 8782                            | 7024                          |
| 56                                     | I                   | 0.0026                            | 82.8                            | 0.0012                        |
|                                        | II                  | 0.0026                            | 40.8                            | 0.0073                        |
|                                        | III                 | 0.047                             | 6278                            | 3267                          |
|                                        | IV                  | 0.19                              | 566                             | 3097                          |
|                                        | V                   | 0.16                              | 4.0                             | 0.028                         |
|                                        | VI                  | 38.8                              | 1711                            | 660                           |
|                                        | Total concentration | 39.2                              | 8782                            | 7024                          |
| 90                                     | I                   | 0.0026                            | 76.8                            | 0.13                          |
|                                        | II                  | 0.0026                            | 19.7                            | 0.023                         |
|                                        | III                 | 0.047                             | 6350                            | 3232                          |
|                                        | IV                  | 0.19                              | 558                             | 2451                          |
|                                        | V                   | 0.16                              | 4.2                             | 0.607                         |
|                                        | VI                  | 38.8                              | 1672                            | 1340                          |
|                                        | Total concentration | 39.2                              | 8782                            | 7024                          |
| 120                                    | I                   | 0.0026                            | 97.3                            | 0.74                          |
|                                        | II                  | 0.0026                            | 56.0                            | 0.48                          |
|                                        | III                 | 0.047                             | 7715                            | 3247                          |
|                                        | IV                  | 0.19                              | 749                             | 3512                          |
|                                        | V                   | 0.16                              | 0.1                             | 1.02                          |
|                                        | VI                  | 38.8                              | 64.9                            | 264                           |
|                                        | Total concentration | 39.2                              | 8782                            | 7024                          |
| 365                                    | I                   | 0.0026                            | 93.9                            | 1.31                          |
|                                        | II                  | 0.0026                            | 68.5                            | 0.44                          |
|                                        | III                 | 0.047                             | 7894                            | 2264                          |
|                                        | IV                  | 0.19                              | 684                             | 4668                          |
|                                        | V                   | 0.16                              | 5.5                             | 12.6                          |
|                                        | VI                  | 38.8                              | 36.1                            | 77.2                          |
|                                        | Total concentration | 39.2                              | 8782                            | 7024                          |



**Table S10.** Data on the statistical processing of the results.

| Data on the statistical processing of the results for Cd |                   |                   |                   |                   |                   |                   |                   |                   |                   |                   |                   |                   |  |
|----------------------------------------------------------|-------------------|-------------------|-------------------|-------------------|-------------------|-------------------|-------------------|-------------------|-------------------|-------------------|-------------------|-------------------|--|
| t-Test: Two-Sample Assuming Unequal Variances            | Step I            |                   | Step II           |                   | Step III          |                   | Step IV           |                   | Step V            |                   | Step VI           |                   |  |
|                                                          | <i>Variable 1</i> | <i>Variable 2</i> |  |
| Mean                                                     | 0.533333          | 0.000583          | 0.883333          | 0.002567          | 4.616667          | 1.983333          | 3.818333          | 0.536667          | 0.012833          | 0.008833          | 2.156667          | 1.85              |  |
| Variance                                                 | 0.072427          | 1.77E-08          | 0.331147          | 9.39E-06          | 2.261667          | 2.643627          | 4.936417          | 0.029187          | 0.000179          | 8.17E-06          | 4.440867          | 5.307             |  |
| Observations                                             | 6                 | 6                 | 6                 | 6                 | 6                 | 6                 | 6                 | 6                 | 6                 | 6                 | 6                 | 6                 |  |
| Hypothesized Mean Difference                             | 0                 |                   | 0                 |                   | 0                 |                   | 0                 |                   | 0                 |                   | 0                 |                   |  |
| df                                                       | 5                 |                   | 5                 |                   | 10                |                   | 5                 |                   | 5                 |                   | 10                |                   |  |
| t Stat                                                   | 4.848973          |                   | 3.749041          |                   | 2.912386          |                   | 3.607315          |                   | 0.715478          |                   | 0.240595          |                   |  |
| P(T<=t) one-tail                                         | 0.002339          |                   | 0.006653          |                   | 0.007751          |                   | 0.007712          |                   | 0.253162          |                   | 0.407365          |                   |  |
| t Critical one-tail                                      | 2.015048          |                   | 2.015048          |                   | 1.812461          |                   | 2.015048          |                   | 2.015048          |                   | 1.812461          |                   |  |
| P(T<=t) two-tail                                         | 0.004678          |                   | 0.013307          |                   | 0.015501          |                   | 0.015424          |                   | 0.506324          |                   | 0.814729          |                   |  |
| t Critical two-tail                                      | 2.570582          |                   | 2.570582          |                   | 2.228139          |                   | 2.570582          |                   | 2.570582          |                   | 2.228139          |                   |  |

  

| Data on the statistical processing of the results for Pb |                   |                   |                   |                   |                   |                   |                   |                   |                   |                   |                   |                   |  |
|----------------------------------------------------------|-------------------|-------------------|-------------------|-------------------|-------------------|-------------------|-------------------|-------------------|-------------------|-------------------|-------------------|-------------------|--|
| t-Test: Two-Sample Assuming Unequal Variances            | Step I            |                   | Step II           |                   | Step III          |                   | Step IV           |                   | Step V            |                   | Step VI           |                   |  |
|                                                          | <i>Variable 1</i> | <i>Variable 2</i> |  |
| Mean                                                     | 0.372533          | 0.226667          | 2.99              | 0.2815            | 398.5667          | 134.985           | 435.9667          | 187.5333          | 0.295017          | 0.003733          | 351.3             | 195.25            |  |
| Variance                                                 | 0.718845          | 0.014427          | 6.74976           | 0.216494          | 48146.65          | 6877.631          | 18752.81          | 3410.347          | 0.034058          | 6.36E-05          | 57798.4           | 21318.98          |  |
| Observations                                             | 6                 | 6                 | 6                 | 6                 | 6                 | 6                 | 6                 | 6                 | 6                 | 6                 | 6                 | 6                 |  |
| Hypothesized Mean Difference                             | 0                 |                   | 0                 |                   | 0                 |                   | 0                 |                   | 0                 |                   | 0                 |                   |  |
| df                                                       | 5                 |                   | 5                 |                   | 6                 |                   | 7                 |                   | 5                 |                   | 8                 |                   |  |
| t Stat                                                   | 0.417253          |                   | 2.51365           |                   | 2.752413          |                   | 4.087612          |                   | 3.86256           |                   | 1.35895           |                   |  |
| P(T<=t) one-tail                                         | 0.346902          |                   | 0.026794          |                   | 0.016593          |                   | 0.002322          |                   | 0.005925          |                   | 0.105617          |                   |  |
| t Critical one-tail                                      | 2.015048          |                   | 2.015048          |                   | 1.94318           |                   | 1.894579          |                   | 2.015048          |                   | 1.859548          |                   |  |
| P(T<=t) two-tail                                         | 0.693804          |                   | 0.053589          |                   | 0.033186          |                   | 0.004645          |                   | 0.011849          |                   | 0.211233          |                   |  |
| t Critical two-tail                                      | 2.570582          |                   | 2.570582          |                   | 2.446912          |                   | 2.364624          |                   | 2.570582          |                   | 2.306004          |                   |  |

  

| Data on the statistical processing of the results for Zn |                   |                   |                   |                   |                   |                   |                   |                   |                   |                   |                   |                   |  |
|----------------------------------------------------------|-------------------|-------------------|-------------------|-------------------|-------------------|-------------------|-------------------|-------------------|-------------------|-------------------|-------------------|-------------------|--|
| t-Test: Two-Sample Assuming Unequal Variances            | Step I            |                   | Step II           |                   | Step III          |                   | Step IV           |                   | Step V            |                   | Step VI           |                   |  |
|                                                          | <i>Variable 1</i> | <i>Variable 2</i> |  |
| Mean                                                     | 55.26667          | 1.531233          | 21.36667          | 1.524333          | 6992              | 2224.933          | 3988              | 739.3833          | 5.15              | 2.735833          | 1272.333          | 1000.833          |  |
| Variance                                                 | 142.2187          | 8.88644           | 194.4587          | 5.939499          | 488863.6          | 1717474           | 4162288           | 33598.56          | 28.307            | 21.18715          | 3344972           | 672560.6          |  |
| Observations                                             | 6                 | 6                 | 6                 | 6                 | 6                 | 6                 | 6                 | 6                 | 6                 | 6                 | 6                 | 6                 |  |
| Hypothesized Mean Difference                             | 0                 |                   | 0                 |                   | 0                 |                   | 0                 |                   | 0                 |                   | 0                 |                   |  |
| df                                                       | 6                 |                   | 5                 |                   | 8                 |                   | 5                 |                   | 10                |                   | 7                 |                   |  |
| t Stat                                                   | 10.70772          |                   | 3.433377          |                   | 7.861236          |                   | 3.884742          |                   | 0.840555          |                   | 0.331792          |                   |  |
| P(T<=t) one-tail                                         | 1.96E-05          |                   | 0.009284          |                   | 2.48E-05          |                   | 0.005793          |                   | 0.210121          |                   | 0.37488           |                   |  |
| t Critical one-tail                                      | 1.94318           |                   | 2.015048          |                   | 1.859548          |                   | 2.015048          |                   | 1.812461          |                   | 1.894579          |                   |  |
| P(T<=t) two-tail                                         | 3.92E-05          |                   | 0.018568          |                   | 4.95E-05          |                   | 0.011586          |                   | 0.420241          |                   | 0.749759          |                   |  |
| t Critical two-tail                                      | 2.446912          |                   | 2.570582          |                   | 2.306004          |                   | 2.570582          |                   | 2.228139          |                   | 2.364624          |                   |  |

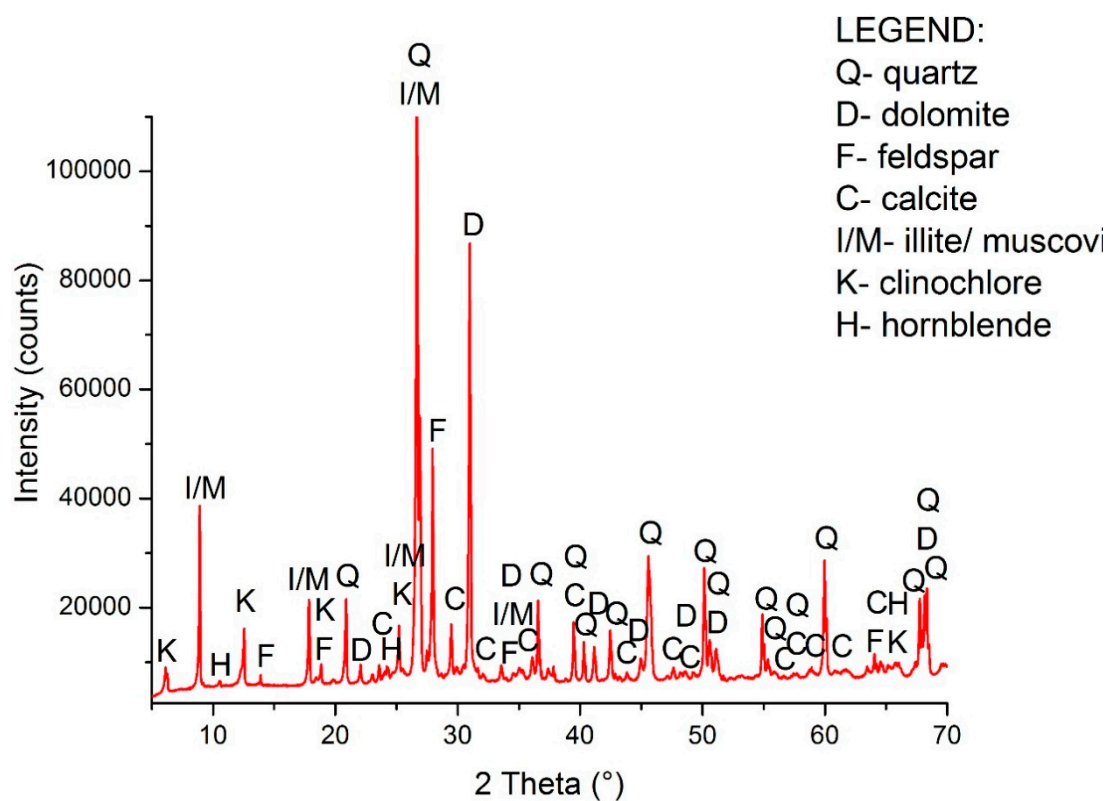

Figure S1. XRD pattern of uncontaminated soil.

A

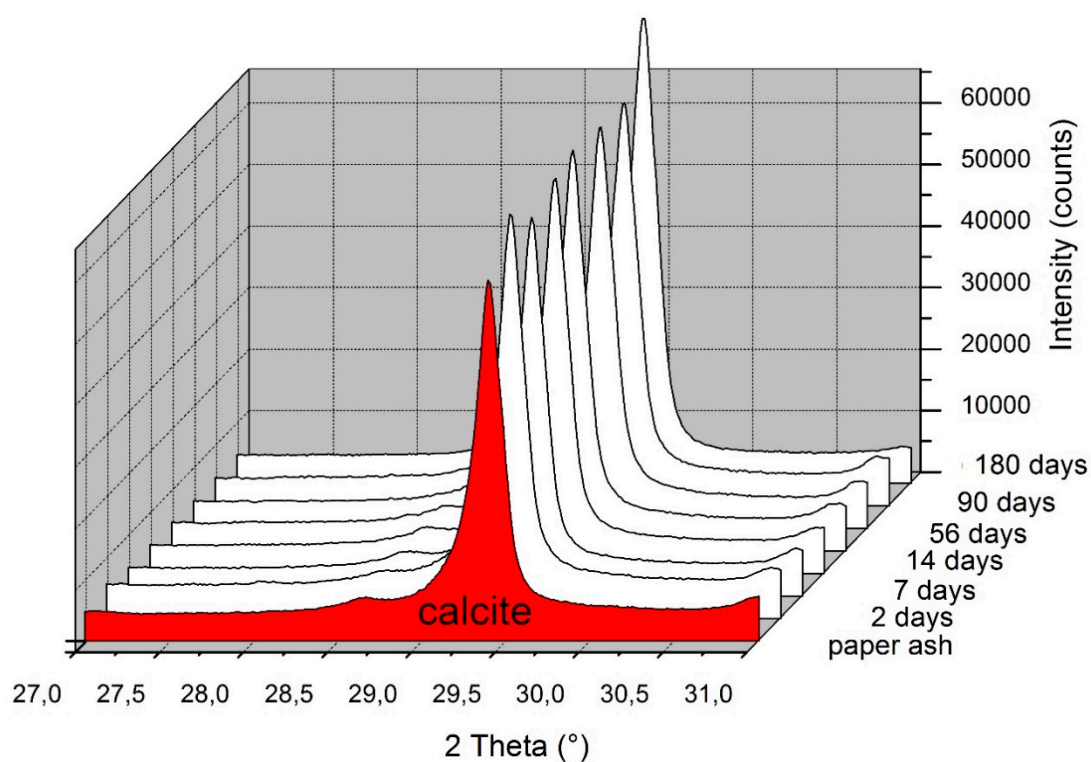

B

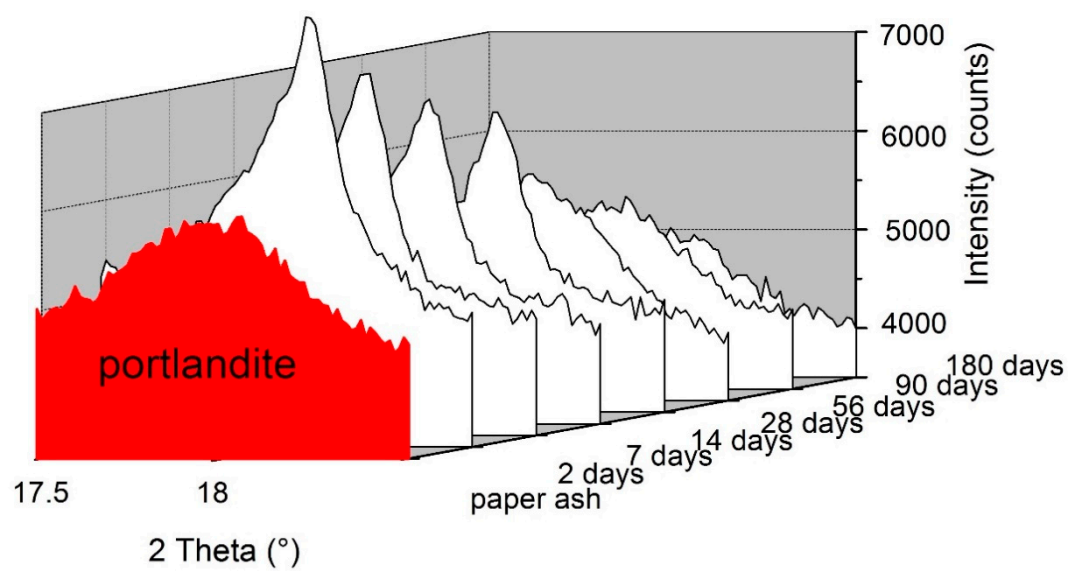

Figure S2. Sections of the XRD patterns of the paper ash paste.

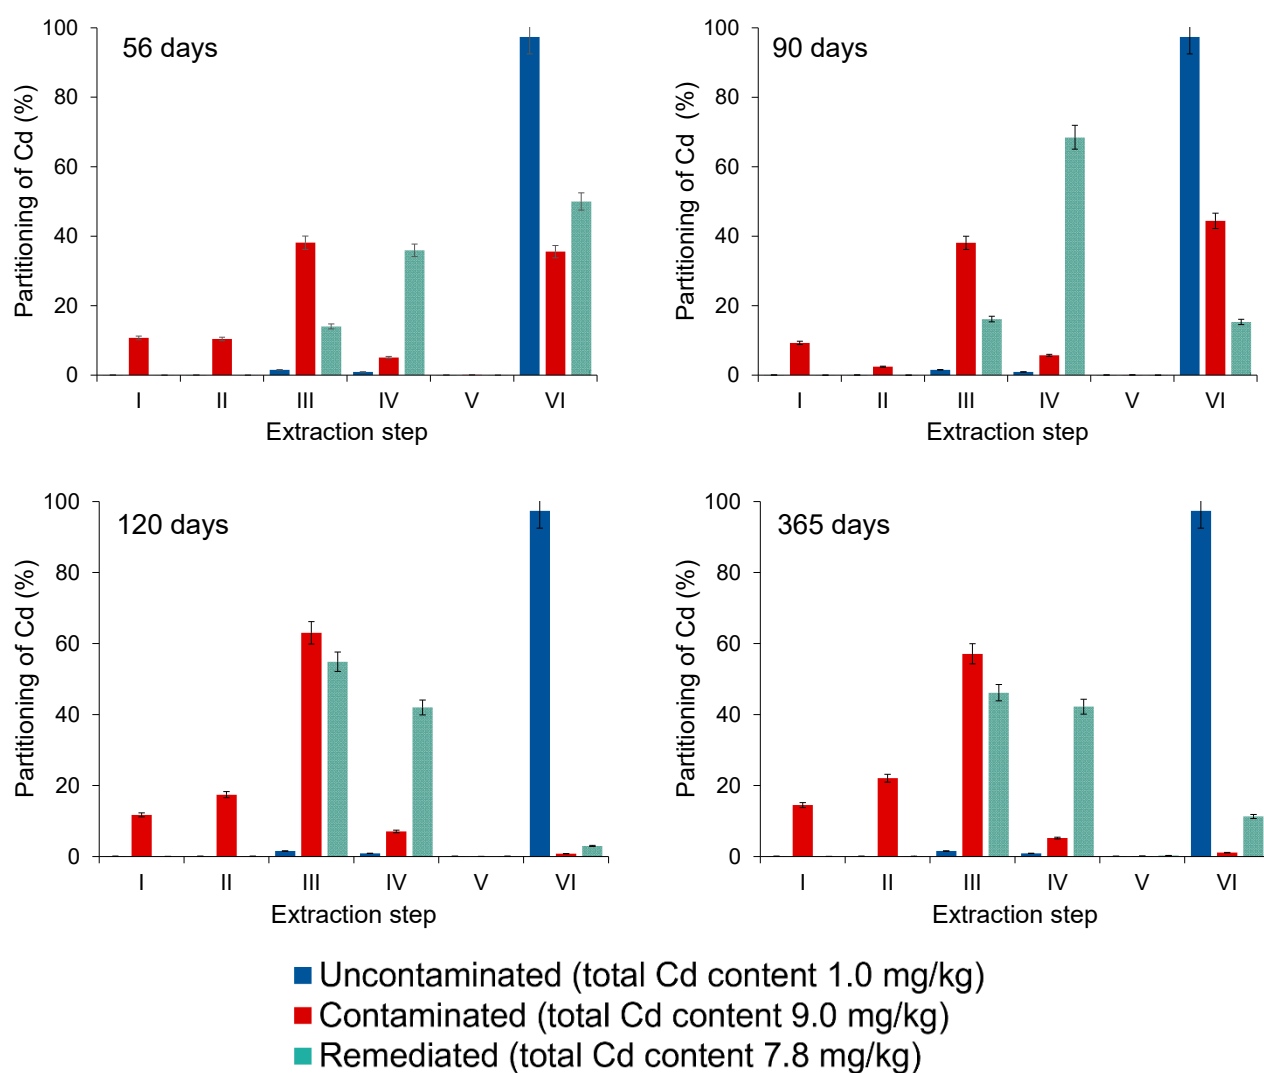

**Figure S3.** Partitioning of Cd in sulphate-treated uncontaminated, contaminated, and remediated soil samples with time elapsed after the remediation.

I water-soluble

II exchangeable

III bound to carbonates

IV bound to Fe/Mn oxides and hydroxides

V bound to organic matter

VI bound to silicate lattice

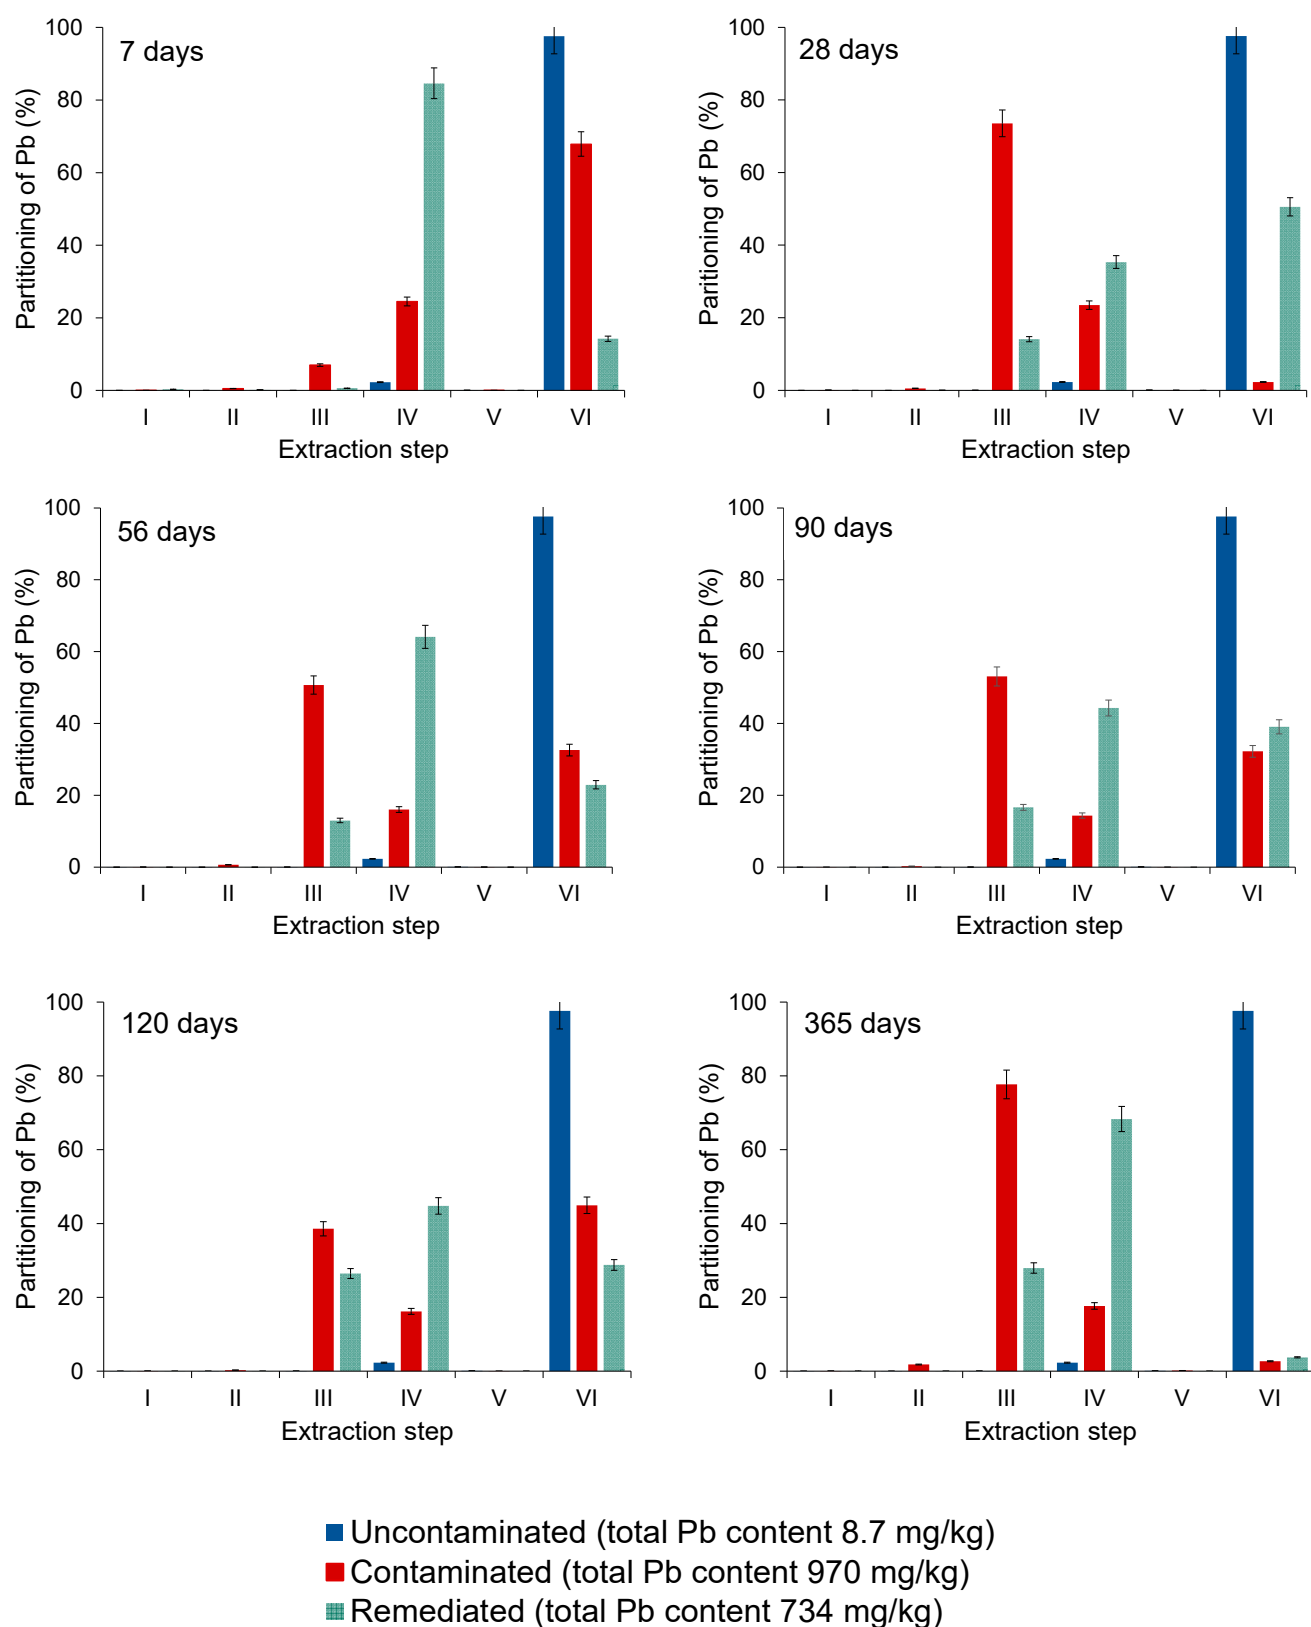

**Figure S4.** Partitioning of Pb in sulphate-treated uncontaminated, contaminated, and remediated soil samples with time elapsed after the remediation.

I water-soluble

II exchangeable

III bound to carbonates

IV bound to Fe/Mn oxides and hydroxides

V bound to organic matter

VI bound to silicate lattice

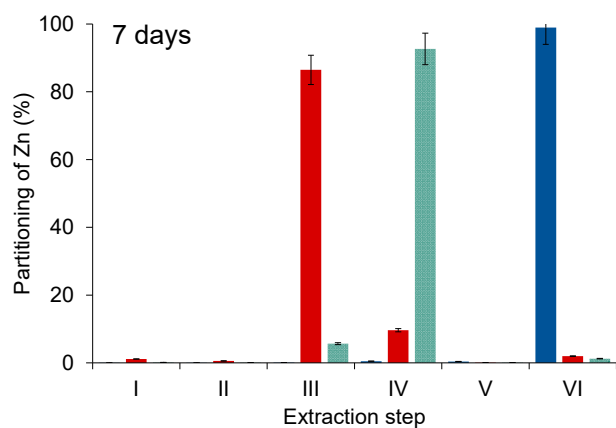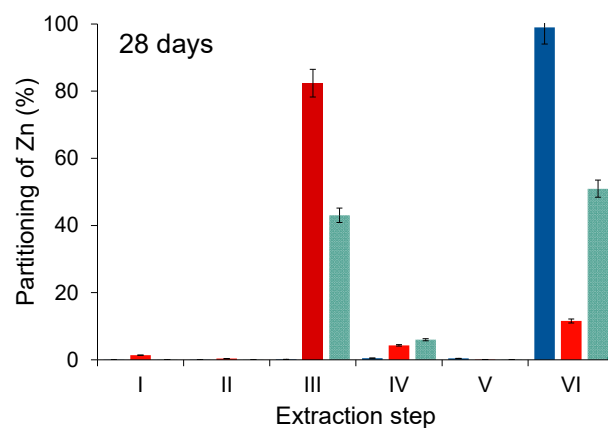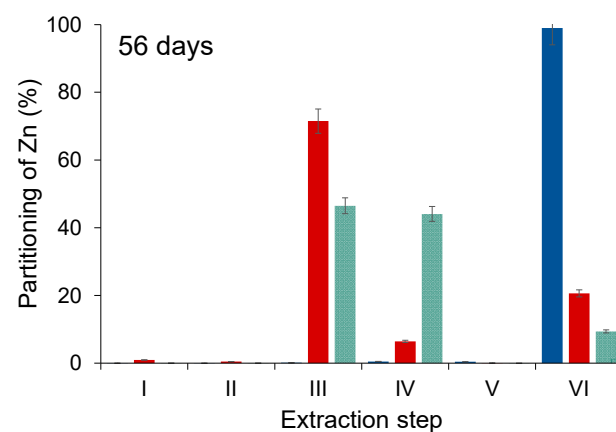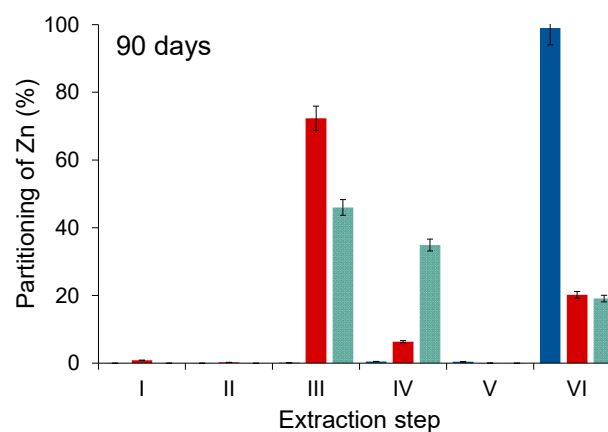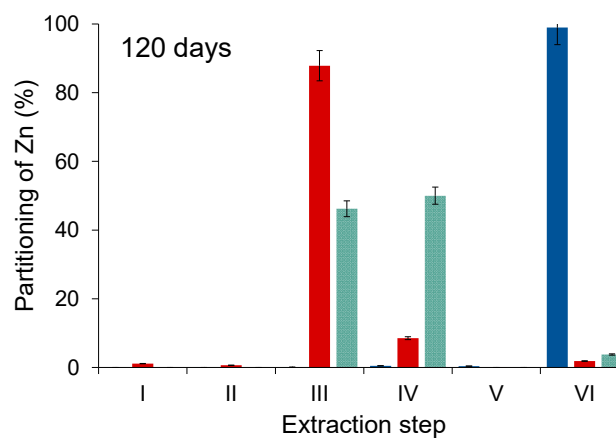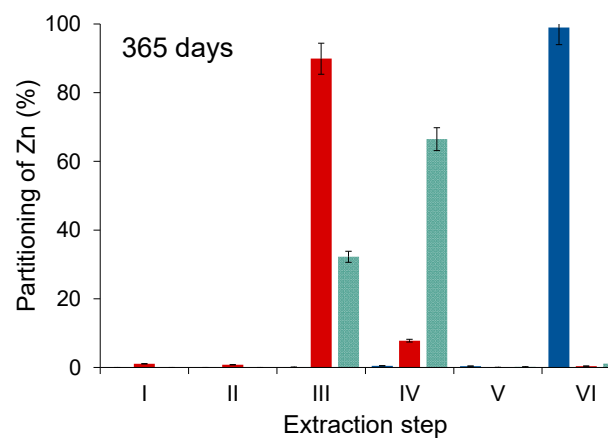

- VI bound to silicate lattice

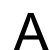

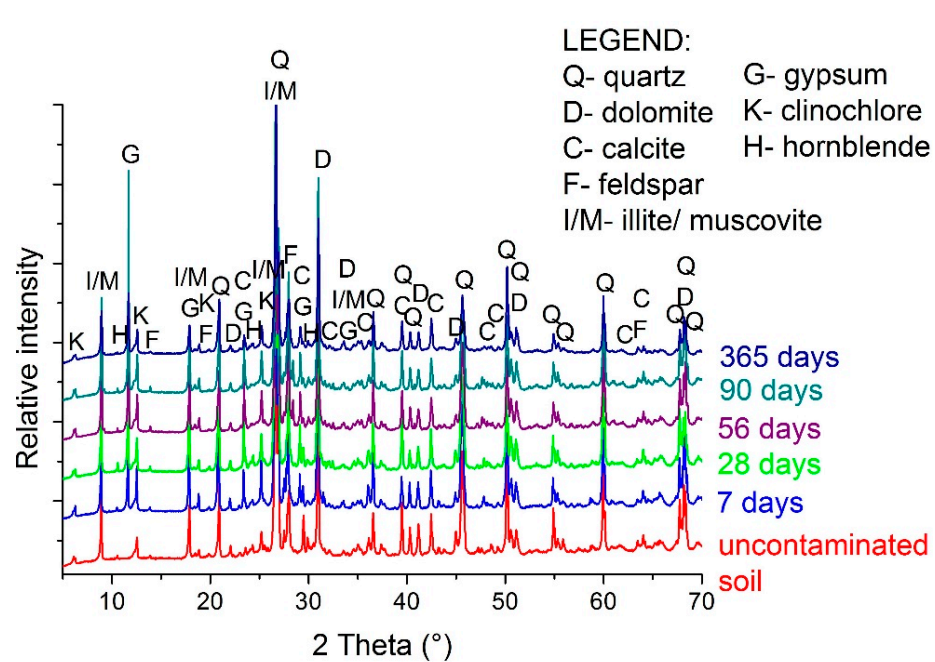

**Figure S6.** XRD patterns of contaminated soil (A) and sulphate-treated contaminated soil (B) with time elapsed.
